# Supplementary material
Source: Springer Nature journal article supplement (https://www.springermedizin.de/resource/supplementary/12967_2013_1727_MOESM3_ESM.pdf/9575140)

**a**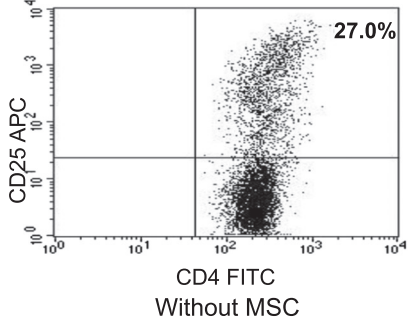**b**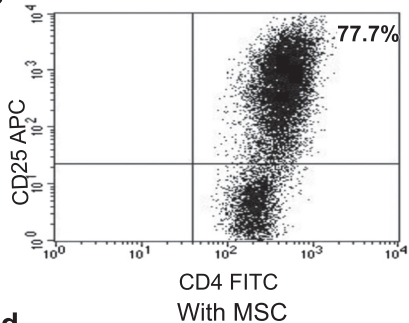**c**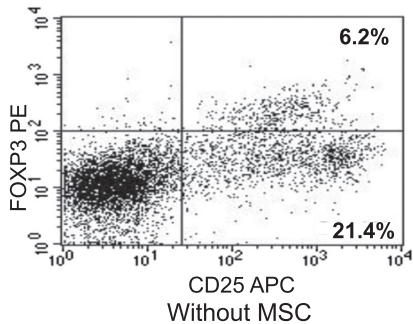**d**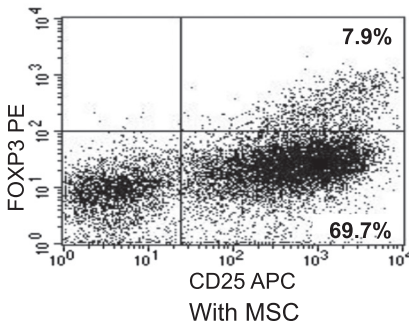

Supplement: MOESM3 [file 9575140]
